# Supplementary material for: Potential of Inulin-Fructooligosaccharides Extract Produced from Red Onion (Allium cepa var. viviparum (Metz) Mansf.) as an Alternative Prebiotic Product
Source: MDPI journal article supplement (doi:10.3390/plants10112401), 2021-11-07
Supplement: s1 [file s1]

**Table S1.** <sup>1</sup>H and <sup>13</sup>C NMR chemical shifts and homonuclear coupling constants of neokestose.

| Residue        | Atom<br>number | <sup>1</sup> H<br>(ppm) | <i>J</i><br>(Hz) | <sup>13</sup> C<br>(ppm) | HMBC<br>correlations |
|----------------|----------------|-------------------------|------------------|--------------------------|----------------------|
| β-Fruf-(2→     | 1a             | 3.70                    |                  | 61.04                    |                      |
|                | 1b             | 3.63                    |                  | -                        |                      |
|                | 2              | -                       |                  | 104.51                   |                      |
|                | 3              | 4.14                    | 8.5              | 77.62                    |                      |
|                | 4              | 4.09                    | 8.1              | 75.17                    |                      |
|                | 5              | 3.82                    |                  | 81.96                    | 75.2                 |
|                | 6a             | 3.75                    |                  | 63.24                    |                      |
|                | 6b             | 3.66                    |                  | -                        | 82.0                 |
| →6)-α-Glcp-(1→ | 1              | 5.35                    | 3.8              | 92.82                    | 104.4,73.2,72.3      |
|                | 2              | 3.51                    | 3.8, 10.0        | 71.82                    |                      |
|                | 3              | 3.70                    | n.d.             | 73.25                    |                      |
|                | 4              | 3.47                    | 9.8, 9.8         | 70.00                    |                      |
|                | 5              | 3.89                    |                  | 72.35                    |                      |
|                | 6a             | 3.88                    |                  | 61.14                    |                      |
|                | 6b             | 3.74                    |                  |                          |                      |
| →2)-β-Fruf     | 1a             | 3.61                    |                  | 62.28                    | 104.5, 77.1          |
|                | 1b             | 3.61                    |                  | -                        |                      |
|                | 2              | -                       |                  | 104.51                   |                      |
|                | 3              | 4.17                    | 8.7              | 77.07                    | 62.3                 |
|                | 4              | 4.015                   | 8.9              | 74.76                    | 82.1                 |
|                | 5              | 3.84                    |                  | 82.16                    |                      |
|                | 6a             | 3.79                    |                  | 63.16                    |                      |
|                | 6b             | 3.74                    |                  | -                        |                      |
